# Supplementary material for: An Evaluation of the Psychometric Properties of the Temporal Satisfaction With Life Scale
Source: Frontiers journal article supplement (doi:10.3389/fpsyg.2022.795478), 2022-04-14
Supplement: Data_Sheet_2.PDF [file Data_Sheet_2.PDF]

|                                                        | Hungarian |          |            |      | Spanish  |          |            |      | Finnish  |          |            |      | Slovene  |          |            |      | Chinese  |          |            |      |
|--------------------------------------------------------|-----------|----------|------------|------|----------|----------|------------|------|----------|----------|------------|------|----------|----------|------------|------|----------|----------|------------|------|
|                                                        | $\alpha$  | $\omega$ | 95% CI     | $se$ | $\alpha$ | $\omega$ | 95% CI     | $se$ | $\alpha$ | $\omega$ | 95% CI     | $se$ | $\alpha$ | $\omega$ | 95% CI     | $se$ | $\alpha$ | $\omega$ | 95% CI     | $se$ |
| <b>Temporal satisfaction with life scale (15-item)</b> |           |          |            |      |          |          |            |      |          |          |            |      |          |          |            |      |          |          |            |      |
| Past                                                   | .86       | .86      | [.84, .87] | .01  | .80      | .80      | [.77, .83] | .01  | .85      | .85      | [.82, .87] | .01  | .81      | .82      | [.78, .85] | .02  | .84      | .85      | [.82, .88] | .02  |
| Present                                                | .90       | .90      | [.89, .91] | .00  | .89      | .89      | [.88, .91] | .01  | .90      | .90      | [.88, .92] | .01  | .89      | .89      | [.87, .91] | .01  | .88      | .89      | [.86, .91] | .01  |
| Future                                                 | .78       | .81      | [.80, .83] | .01  | .72      | .72      | [.68, .76] | .02  | .83      | .82      | [.78, .86] | .02  | .84      | .85      | [.82, .87] | .01  | .74      | .79      | [.73, .84] | .03  |
| Total                                                  | .91       | .91      | [.90, .92] | .00  | .88      | .87      | [.85, .89] | .01  | .94      | .94      | [.93, .95] | .01  | .90      | .90      | [.88, .92] | .01  | .90      | .90      | [.88, .92] | .01  |
| <b>Temporal satisfaction with life scale (12-item)</b> |           |          |            |      |          |          |            |      |          |          |            |      |          |          |            |      |          |          |            |      |
| Past                                                   | .85       | .84      | [.83, .86] | .01  | .80      | .81      | [.78, .83] | .01  | .85      | .85      | [.81, .88] | .02  | .80      | .82      | [.78, .85] | .02  | .88      | .88      | [.85, .91] | .02  |
| Present                                                | .89       | .89      | [.88, .90] | .01  | .89      | .89      | [.87, .91] | .01  | .89      | .89      | [.87, .92] | .01  | .88      | .89      | [.86, .91] | .01  | .90      | .90      | [.87, .92] | .01  |
| Future                                                 | .86       | .87      | [.86, .88] | .01  | .81      | .82      | [.79, .85] | .02  | .84      | .84      | [.80, .87] | .02  | .90      | .90      | [.88, .92] | .01  | .87      | .87      | [.82, .90] | .02  |
| <b>Strengths use and current knowledge scale</b>       |           |          |            |      |          |          |            |      |          |          |            |      |          |          |            |      |          |          |            |      |
| Use                                                    | .90       | .90      | [.89, .91] | .01  | .87      | .88      | [.86, .90] | .01  | .89      | .89      | [.87, .91] | .01  | .84      | .84      | [.80, .87] | .02  | .85      | .85      | [.81, .89] | .02  |
| Knowledge                                              | .84       | .85      | [.83, .87] | .01  | .71      | .73      | [.68, .76] | .02  | .84      | .85      | [.82, .88] | .02  | .77      | .78      | [.72, .84] | .03  | .75      | .77      | [.72, .82] | .03  |
| Total                                                  | .91       | .92      | [.91, .92] | .00  | .87      | .87      | [.86, .89] | .01  | .92      | .92      | [.90, .93] | .01  | .86      | .86      | [.83, .89] | .02  | .87      | .87      | [.84, .90] | .02  |
| <b>Subjective happiness scale</b>                      |           |          |            |      |          |          |            |      |          |          |            |      |          |          |            |      |          |          |            |      |
| Subjective happiness                                   | .81       | .81      | [.79, .83] | .01  | .74      | .74      | [.70, .78] | .02  | .49      | .66      | [.60, .72] | .03  | .79      | .80      | [.76, .84] | .02  | .76      | .77      | [.69, .82] | .03  |
| <b>Gratitude questionnaire</b>                         |           |          |            |      |          |          |            |      |          |          |            |      |          |          |            |      |          |          |            |      |
| Gratitude                                              | .77       | .77      | [.74, .79] | .01  | .75      | .72      | [.67, .78] | .03  | .71      | .72      | [.67, .76] | .02  | .71      | .72      | [.66, .76] | .03  | .79      | .80      | [.74, .84] | .02  |
| <b>Adult hope scale</b>                                |           |          |            |      |          |          |            |      |          |          |            |      |          |          |            |      |          |          |            |      |
| Agency                                                 | .82       | .81      | [.79, .83] | .01  | .83      | .83      | [.80, .86] | .01  | .83      | .83      | [.79, .87] | .02  | .72      | .73      | [.64, .80] | .04  | .84      | .84      | [.80, .88] | .02  |
| Pathway                                                | .82       | .83      | [.80, .84] | .01  | .78      | .79      | [.75, .82] | .02  | .68      | .68      | [.58, .75] | .04  | .68      | .71      | [.64, .77] | .03  | .69      | .70      | [.61, .76] | .04  |
| Total                                                  | .88       | .88      | [.87, .89] | .01  | .87      | .87      | [.85, .89] | .01  | .86      | .86      | [.82, .89] | .02  | .78      | .78      | [.72, .83] | .03  | .85      | .86      | [.83, .89] | .02  |
| <b>Meaning in life questionnaire</b>                   |           |          |            |      |          |          |            |      |          |          |            |      |          |          |            |      |          |          |            |      |
| Presence                                               | .92       | .92      | [.91, .92] | .01  | .88      | .88      | [.86, .90] | .01  | .79      | .81      | [.77, .84] | .02  | .89      | .89      | [.86, .91] | .01  | .82      | .83      | [.78, .86] | .02  |
| Search                                                 | .85       | .85      | [.83, .87] | .01  | .90      | .90      | [.88, .91] | .01  | .87      | .88      | [.85, .90] | .01  | .89      | .89      | [.86, .91] | .01  | .86      | .86      | [.82, .90] | .02  |

**Rumination**

|            |     |     |            |     |     |     |            |     |     |     |            |     |     |     |            |     |     |     |            |     |
|------------|-----|-----|------------|-----|-----|-----|------------|-----|-----|-----|------------|-----|-----|-----|------------|-----|-----|-----|------------|-----|
| Rumination | .88 | .88 | [.87, .89] | .01 | .84 | .85 | [.82, .87] | .01 | .87 | .87 | [.84, .90] | .01 | .82 | .82 | [.78, .85] | .02 | .86 | .86 | [.83, .89] | .02 |
|------------|-----|-----|------------|-----|-----|-----|------------|-----|-----|-----|------------|-----|-----|-----|------------|-----|-----|-----|------------|-----|

**Centre for Epidemiological  
Studies Depression scale**

|            |     |     |            |     |     |     |            |     |     |     |            |     |     |     |            |     |     |     |            |     |
|------------|-----|-----|------------|-----|-----|-----|------------|-----|-----|-----|------------|-----|-----|-----|------------|-----|-----|-----|------------|-----|
| Depression | .92 | .92 | [.91, .93] | .00 | .91 | .91 | [.90, .92] | .01 | .92 | .93 | [.91, .94] | .01 | .91 | .91 | [.89, .93] | .01 | .90 | .90 | [.88, .92] | .01 |
|------------|-----|-----|------------|-----|-----|-----|------------|-----|-----|-----|------------|-----|-----|-----|------------|-----|-----|-----|------------|-----|

**Czech**

|  | $\alpha$ | $\omega$ | 95% CI | $se$ |
|--|----------|----------|--------|------|
|--|----------|----------|--------|------|

**Temporal satisfaction with**

**life scale (15-item)**

|         |     |     |            |     |
|---------|-----|-----|------------|-----|
| Past    | .80 | .80 | [.76, .84] | .02 |
| Present | .88 | .88 | [.85, .90] | .01 |
| Future  | .80 | .84 | [.80, .88] | .02 |
| Total   | .90 | .90 | [.88, .92] | .01 |

**Temporal satisfaction with**

**life scale (12-item)**

|         |     |     |            |     |
|---------|-----|-----|------------|-----|
| Past    | .77 | .78 | [.73, .83] | .02 |
| Present | .86 | .86 | [.82, .89] | .02 |
| Future  | .90 | .90 | [.87, .92] | .01 |

**Strengths use and current**

**knowledge scale**

|           |     |     |            |     |
|-----------|-----|-----|------------|-----|
| Use       | .88 | .88 | [.84, .90] | .01 |
| Knowledge | .83 | .84 | [.79, .87] | .02 |
| Total     | .90 | .90 | [.88, .92] | .01 |

**Subjective happiness scale**

|                      |     |     |            |     |
|----------------------|-----|-----|------------|-----|
| Subjective happiness | .82 | .82 | [.76, .86] | .02 |
|----------------------|-----|-----|------------|-----|

**Gratitude questionnaire**

|           |     |     |            |     |
|-----------|-----|-----|------------|-----|
| Gratitude | .79 | .80 | [.75, .84] | .02 |
|-----------|-----|-----|------------|-----|

**Adult hope scale**

|        |     |     |            |     |
|--------|-----|-----|------------|-----|
| Agency | .79 | .80 | [.75, .84] | .02 |
|--------|-----|-----|------------|-----|

|                                                            |     |     |            |     |
|------------------------------------------------------------|-----|-----|------------|-----|
| Pathway                                                    | .78 | .79 | [.72, .83] | .03 |
| Total                                                      | .84 | .84 | [.80, .88] | .02 |
| <b>Meaning in life questionnaire</b>                       |     |     |            |     |
| Presence                                                   | .89 | .90 | [.87, .92] | .01 |
| Search                                                     | .83 | .84 | [.80, .88] | .02 |
| <b>Rumination</b>                                          |     |     |            |     |
| Rumination                                                 | .83 | .83 | [.79, .87] | .02 |
| <b>Centre for Epidemiological Studies Depression scale</b> |     |     |            |     |
| Depression                                                 | .90 | .91 | [.88, .93] | .01 |

*Note.* Hungarian  $n = 1,136$ ; Spanish  $n = 693$ ; Finnish  $n = 335$ , Slovene  $n = 288$ ; Chinese  $n = 228$ ; Czech  $n = 250$ . The 95% confidence interval and standard error reported refers to the omega coefficient.

|                                                        | Oceania  |          |            |     | North America |          |            |     | Europe   |          |            |     | Asia     |          |            |     |
|--------------------------------------------------------|----------|----------|------------|-----|---------------|----------|------------|-----|----------|----------|------------|-----|----------|----------|------------|-----|
|                                                        | $\alpha$ | $\omega$ | 95% CI     | se  | $\alpha$      | $\omega$ | 95% CI     | se  | $\alpha$ | $\omega$ | 95% CI     | se  | $\alpha$ | $\omega$ | 95% CI     | se  |
| <b>Temporal satisfaction with life scale (15-item)</b> |          |          |            |     |               |          |            |     |          |          |            |     |          |          |            |     |
| Past                                                   | .87      | .87      | [.86, .88] | .01 | .85           | .85      | [.83, .87] | .01 | .85      | .85      | [.83, .87] | .01 | .80      | .80      | [.75, .84] | .02 |
| Present                                                | .91      | .91      | [.91, .92] | .00 | .91           | .91      | [.90, .92] | .01 | .90      | .90      | [.89, .91] | .01 | .89      | .89      | [.86, .92] | .01 |
| Future                                                 | .86      | .87      | [.86, .88] | .01 | .85           | .86      | [.85, .88] | .01 | .85      | .86      | [.85, .88] | .01 | .81      | .82      | [.77, .86] | .02 |
| Total                                                  | .92      | .91      | [.91, .92] | .00 | .91           | .91      | [.90, .92] | .00 | .91      | .91      | [.89, .92] | .01 | .87      | .87      | [.84, .90] | .01 |
| <b>Temporal satisfaction with life scale (12-item)</b> |          |          |            |     |               |          |            |     |          |          |            |     |          |          |            |     |
| Past                                                   | .86      | .86      | [.85, .87] | .01 | .85           | .86      | [.84, .87] | .01 | .86      | .86      | [.84, .87] | .01 | .80      | .81      | [.76, .85] | .02 |
| Present                                                | .90      | .91      | [.90, .91] | .00 | .90           | .90      | [.89, .91] | .01 | .89      | .89      | [.88, .91] | .01 | .89      | .89      | [.86, .91] | .01 |
| Future                                                 | .91      | .91      | [.90, .92] | .00 | .91           | .91      | [.90, .92] | .01 | .90      | .90      | [.89, .92] | .01 | .90      | .90      | [.87, .92] | .01 |
| <b>Strengths use and current knowledge scale</b>       |          |          |            |     |               |          |            |     |          |          |            |     |          |          |            |     |

|                                                            |     |     |            |     |     |     |            |     |     |     |            |     |     |     |            |     |
|------------------------------------------------------------|-----|-----|------------|-----|-----|-----|------------|-----|-----|-----|------------|-----|-----|-----|------------|-----|
| Use                                                        | .89 | .89 | [.88, .90] | .01 | .88 | .88 | [.87, .90] | .01 | .88 | .89 | [.87, .90] | .01 | .86 | .86 | [.82, .90] | .02 |
| Knowledge                                                  | .78 | .79 | [.77, .81] | .01 | .76 | .76 | [.73, .80] | .02 | .75 | .75 | [.71, .78] | .02 | .70 | .70 | [.61, .77] | .04 |
| Total                                                      | .89 | .90 | [.89, .90] | .00 | .89 | .89 | [.88, .91] | .01 | .88 | .88 | [.86, .89] | .01 | .87 | .87 | [.83, .90] | .02 |
| <b>Subjective happiness scale</b>                          |     |     |            |     |     |     |            |     |     |     |            |     |     |     |            |     |
| Subjective happiness                                       | .86 | .86 | [.85, .88] | .01 | .86 | .86 | [.84, .88] | .01 | .82 | .82 | [.80, .85] | .01 | .75 | .77 | [.71, .82] | .03 |
| <b>Gratitude questionnaire</b>                             |     |     |            |     |     |     |            |     |     |     |            |     |     |     |            |     |
| Gratitude                                                  | .84 | .83 | [.82, .85] | .01 | .84 | .84 | [.81, .86] | .01 | .80 | .80 | [.77, .82] | .01 | .77 | .76 | [.69, .80] | .03 |
| <b>Adult hope scale</b>                                    |     |     |            |     |     |     |            |     |     |     |            |     |     |     |            |     |
| Agency                                                     | .83 | .83 | [.82, .85] | .01 | .84 | .84 | [.82, .86] | .01 | .81 | .81 | [.78, .84] | .01 | .79 | .80 | [.72, .85] | .03 |
| Pathway                                                    | .81 | .81 | [.79, .83] | .01 | .83 | .83 | [.80, .85] | .01 | .78 | .78 | [.75, .81] | .02 | .73 | .73 | [.65, .78] | .03 |
| Total                                                      | .88 | .88 | [.87, .89] | .01 | .88 | .88 | [.87, .90] | .01 | .86 | .86 | [.84, .88] | .01 | .83 | .83 | [.79, .87] | .02 |
| <b>Meaning in life questionnaire</b>                       |     |     |            |     |     |     |            |     |     |     |            |     |     |     |            |     |
| Presence                                                   | .91 | .91 | [.91, .92] | .00 | .93 | .93 | [.92, .94] | .00 | .90 | .90 | [.88, .91] | .01 | .87 | .87 | [.83, .90] | .02 |
| Search                                                     | .91 | .91 | [.91, .92] | .00 | .91 | .91 | [.90, .92] | .01 | .91 | .91 | [.90, .92] | .01 | .91 | .91 | [.88, .94] | .02 |
| <b>Rumination</b>                                          |     |     |            |     |     |     |            |     |     |     |            |     |     |     |            |     |
| Rumination                                                 | .88 | .88 | [.87, .89] | .00 | .89 | .89 | [.87, .90] | .01 | .87 | .88 | [.86, .89] | .01 | .86 | .86 | [.83, .89] | .02 |
| <b>Centre for Epidemiological Studies Depression scale</b> |     |     |            |     |     |     |            |     |     |     |            |     |     |     |            |     |
| Depression                                                 | .92 | .93 | [.92, .93] | .00 | .92 | .92 | [.91, .93] | .00 | .93 | .93 | [.92, .94] | .00 | .90 | .90 | [.88, .92] | .01 |

---

*Note.* Oceania  $n = 1,928$ ; North America  $n = 956$ , Europe  $n = 779$ ; Asia  $n = 216$ . The 95% confidence interval and standard error reported refers to the omega coefficient.
